# Supplementary material for: Volatile Composition and Sensory Profiles of a Shiraz Wine Product Made with Pre- and Post-Fermentation Additions of Ganoderma lucidum Extract
Source: PubMed Central journal article supplement (PMC6915547; doi:10.3390/foods8110538), 2019-11-01
Supplement: foods-08-00538-s001.pdf [file foods-08-00538-s001.pdf]

## SUPPLEMENTARY INFORMATION FOR

### Volatile composition and sensory profiles of a Shiraz wine product made with pre- and post-fermentation additions of *Ganoderma lucidum* extract

Anh N.H. Nguyen<sup>1</sup>, Dimitra L. Capone<sup>1,2</sup>, Trent E. Johnson<sup>1</sup>, David W. Jeffery<sup>1,2</sup>, Lukas Danner<sup>1</sup> and Susan S.P. Bastian<sup>1,2,\*</sup>

<sup>1</sup> School of Agriculture, Food and Wine, The University of Adelaide, Waite Campus, PMB 1, Glen Osmond, SA, 5064, Australia; anhngochoang.nguyen@adelaide.edu.au; dimitra.capone@adelaide.edu.au; trent.johnson@adelaide.edu.au; david.jeffery@adelaide.edu.au; lukas.danner@adelaide.edu.au; sue.bastian@adelaide.edu.au.

<sup>2</sup> Australian Research Council Training Centre for Innovative Wine Production, The University of Adelaide, Waite Campus, PMB 1, Glen Osmond, SA, 5064, Australia.

\* Correspondence: sue.bastian@adelaide.edu.au; Tel.: +61 883136647

#### TABLE OF CONTENTS

|                                                                                                                                                                                                                                                                           | Page |
|---------------------------------------------------------------------------------------------------------------------------------------------------------------------------------------------------------------------------------------------------------------------------|------|
| <b>Figure S1.</b> Shiraz winemaking process under specific conditions in the 28 L winemaking experiment.                                                                                                                                                                  | S-2  |
| <b>Figure S2.</b> Weighted regression coefficients of both aroma and flavor of red fruit (A and B), dried fruit (C and D) and mushrooms (E and F) notes.                                                                                                                  | S-3  |
| <b>Table S1.</b> Brix values (°) measured by refractometer from the beginning to the end of small-scale fermentation of Chemically Defined Grape Juice Media (CDGJM) and Red Grape Juice (RGJ).                                                                           | S-4  |
| <b>Table S2.</b> Impact of <i>GL</i> on liking, perceived sensory attribute overall intensity and CATA ratings from benchtop evaluations of commercial Shiraz wine spiked with <i>GL</i> (panel n = 32) and medium-scale pre-fermentation <i>GL</i> wines (panel n = 11). | S-4  |
| <b>Table S3.</b> Significant sensory attribute intensity means of <i>GL</i> wines (from 28 L ferments) generated by RATA panel.                                                                                                                                           | S-5  |

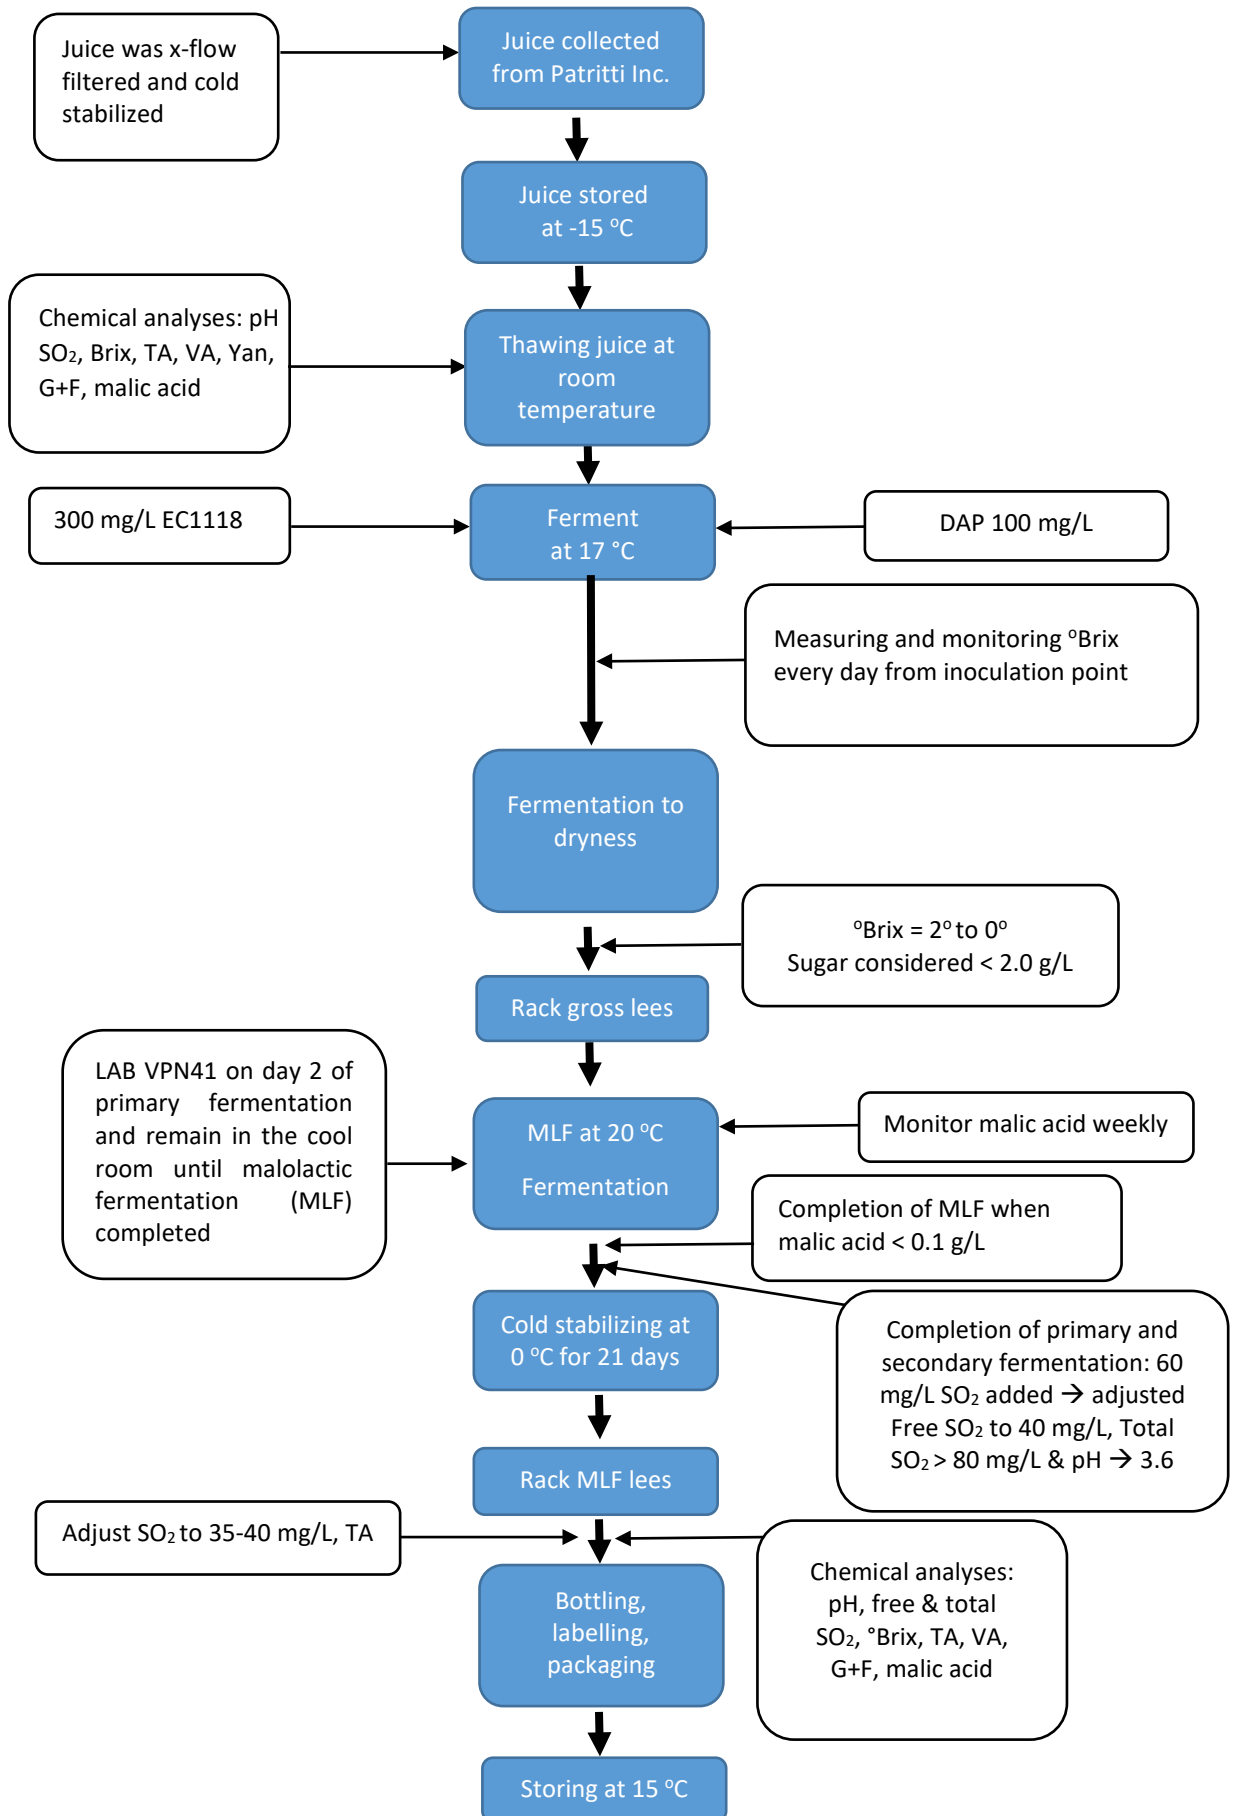

Figure S1. Shiraz winemaking process under specific conditions in the 28 L winemaking experiment.

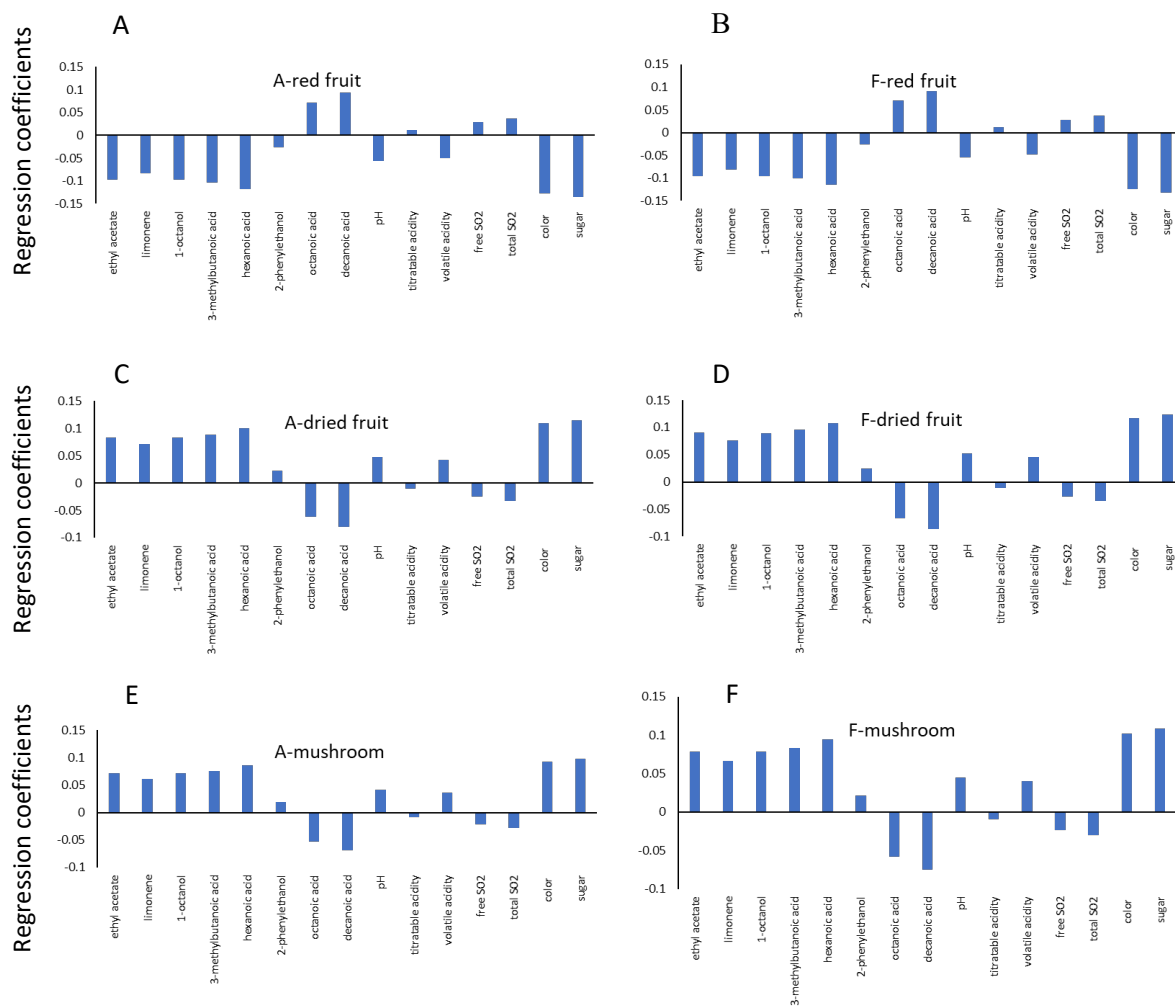

**Figure S2.** Weighted regression coefficients of both aroma and flavor of red fruit (A and B), dried fruit (C and D) and mushrooms (E and F) notes.

**Table S1.** Brix values (°) measured by refractometer from the beginning to the end of small-scale fermentation of Chemically Defined Grape Juice Media (CDGJM) and Red Grape Juice (RGJ).

|           | Day 0  | Day 1  | Day 2   | Day 3  | Day 4  | Day 5  | Day 6  | Day 7  | Day 8  | Day 9  |
|-----------|--------|--------|---------|--------|--------|--------|--------|--------|--------|--------|
| CDGJM-0   | 21.6 j | 19.0 d | 15.2 b  | 11.9 b | 9.5 d  | 8.4 e  | 7.2 g  | 6.9 h  | 6.5 i  | 6.6 i  |
| RGJ-0     | 23.6 f | 19.9 b | 15.9 a  | 13.0 a | 10.8 b | 9.6 c  | 8.3 e  | 8.4 e  | 8.3 f  | 8.2 ef |
| CDGJM-4.5 | 22.1 i | 17.3 f | 10.9 g  | 7.0 h  | 7.2 i  | 7.1 g  | 7.0 g  | 7.2 g  | 7.1 h  | 7.1 h  |
| RGJ-4.5   | 23.8 e | 19.6 c | 14.6 c  | 11.2 c | 9.1 e  | 8.4 e  | 8.2 e  | 8.3 e  | 8.2 f  | 8.1 f  |
| CDGJM-9   | 22.6 h | 17.3 f | 11.1 fg | 7.5 g  | 7.7 h  | 7.6 f  | 7.6 f  | 7.6 f  | 7.7 g  | 7.6 g  |
| RGJ-9     | 24.1 d | 19.6 c | 13.7 d  | 10.5 d | 8.9 f  | 8.7 d  | 8.6 d  | 8.6 d  | 8.6 e  | 8.4 e  |
| CDGJM-18  | 23.4 g | 17.4 f | 11.2 fg | 8.4 f  | 8.7 g  | 8.7 d  | 8.7 d  | 8.8 d  | 8.9 d  | 8.6 d  |
| RGJ-18    | 24.6 b | 19.6 c | 13.5 de | 10.4 d | 9.5 d  | 9.5 c  | 9.3 c  | 9.3 c  | 9.2 c  | 9.3 c  |
| CDGJM-36  | 24.3 c | 17.7 e | 11.4 f  | 9.7 e  | 9.9 c  | 9.8 b  | 9.8 b  | 9.8 b  | 9.7 b  | 9.8 b  |
| RGJ-36    | 25.9 a | 20.3 a | 13.3 e  | 11.1 c | 11.1 a | 11.0 a | 10.9 a | 10.9 a | 10.8 a | 10.7 a |

Means within a column followed by different letters are significantly different ( $p < 0.05$ )  
Significance level at  $p < 0.05$ , data analyzed by one-way ANOVA, Fisher's LSD

**Table S2.** Impact of *GL* on liking, perceived sensory attribute overall intensity and CATA ratings from benchtop evaluations of commercial Shiraz wine spiked with *GL* (panel n = 32) and medium-scale pre-fermentation *GL* wines (panel n = 11).

**Commercial Shiraz wine spiked with *GL***

| Wine | Liking  | Overall intensity |           |         |         |       |            |             | CATA          |                 |                  |            |
|------|---------|-------------------|-----------|---------|---------|-------|------------|-------------|---------------|-----------------|------------------|------------|
|      |         | Aroma             | Sweetness | Acidity | Hotness | Umami | Bitterness | Astringency | Earthy aroma* | Mushroom aroma* | Red berry aroma* | Oak aroma* |
| 0    | 5.25 a  | 4.16 b            | 2.51 ab   | 4.45    | 4.25    | 2.93  | 4.03 b     | 4.06        | 22b           | 9c              | 53               | 47a        |
| 2.25 | 5.17 a  | 4.46 ab           | 2.96 ab   | 4.34    | 4.37    | 3.18  | 3.90 b     | 3.93        | 13b           | 22bc            | 53               | 22ab       |
| 4.5  | 4.72 ab | 4.43 ab           | 3.00 a    | 4.31    | 4.40    | 3.34  | 4.40 b     | 4.06        | 25b           | 38abc           | 56               | 19b        |
| 6.75 | 4.48 ab | 4.53 ab           | 2.28 b    | 4.18    | 4.12    | 3.59  | 4.56 b     | 3.93        | 34ab          | 44ab            | 31               | 19b        |
| 9.0  | 4.06 b  | 5.00 a            | 2.53 ab   | 4.06    | 4.09    | 3.56  | 5.28 a     | 4.18        | 56a           | 56a             | 28               | 28ab       |

**Medium-scale pre-fermentation *GL* wines**

| Wine | Liking | Overall intensity |           |         |         |       |            |             | CATA           |                  |                |
|------|--------|-------------------|-----------|---------|---------|-------|------------|-------------|----------------|------------------|----------------|
|      |        | Aroma             | Sweetness | Acidity | Hotness | Umami | Bitterness | Astringency | Floral flavor* | Tropical flavor* | Lychee flavor* |
| 0    | 4.27   | 5.54              | 6.27 a    | 4.00 b  | 2.18 b  | 2.36  | 2.36 b     | 2.50        | 55a            | 73               | 73a            |
| 4.5  | 4.90   | 5.40              | 3.00 b    | 5.80 a  | 3.80 a  | 3.30  | 3.80 a     | 3.30        | 0b             | 36               | 9b             |
| 9.0  | 4.44   | 5.67              | 3.22 b    | 5.56 a  | 3.78 a  | 3.56  | 4.33 a     | 3.22        | 18ab           | 27               | 9b             |

Values for liking and aroma and palate attribute overall intensities are mean values. Means within a column followed by different letters are significantly different ( $p < 0.05$ ) analyzed by one-way ANOVA, with Fisher's LSD. \*Only significantly different attributes from the CATA evaluations shown as selection frequency percentage based on Cochran's Q tests are presented. Sheskin critical difference pairwise comparison was used to test significant differences between wine treatments and indicated by lower case letters.

**Table S3.** Significant sensory attribute intensity means of *GL* wines (from 28 L ferments) generated by RATA panel.

| Sensory attributes | Control | POST 1  | POST 4 | PRE 1  | PRE 2   | PRE 4   |
|--------------------|---------|---------|--------|--------|---------|---------|
| Ap-red             | 4.2 a   | 4.0 b   | 3.9 b  | 4.0 b  | 4.1 b   | 3.7 c   |
| Ap-brown           | 2.3 d   | 2.8 c   | 3.7 a  | 2.5 d  | 2.9 c   | 3.4 b   |
| A-red fruit        | 3.7 a   | 3.3 b   | 2.9 c  | 3.6 a  | 3.5 ab  | 3.0 c   |
| A-dried fruit      | 1.6 d   | 1.8 cd  | 2.2 a  | 1.6 d  | 1.9 bc  | 2.1 ab  |
| A-jammy            | 2.0 ab  | 2.1 a   | 2.0 ab | 1.7 b  | 2.0 a   | 2.0 ab  |
| A-confectionery    | 2.9 ab  | 2.7 bc  | 2.1 e  | 3.0 a  | 2.5 cd  | 2.3 de  |
| A-cooked vegetable | 0.4 b   | 0.4 b   | 0.6 a  | 0.3 b  | 0.5 ab  | 0.7 a   |
| A-earthly          | 0.7 c   | 0.8 bc  | 1.1 a  | 0.7 c  | 1.0 a   | 1.0 ab  |
| A-floral           | 2.2 a   | 2.2 a   | 1.8 b  | 2.2 a  | 2.0 ab  | 1.7 b   |
| A-mushroom         | 0.4 c   | 0.5 bc  | 0.8 a  | 0.4 c  | 0.6 ab  | 0.7 ab  |
| A-leather          | 0.5 abc | 0.5 bc  | 0.7 ab | 0.4 c  | 0.6 ab  | 0.7 a   |
| A-savory           | 0.7 b   | 0.7 b   | 1.2 a  | 0.7 b  | 1.0 a   | 1.1 a   |
| A-spice            | 1.4 ab  | 1.3 b   | 1.5 a  | 1.4 ab | 1.4 ab  | 1.2 b   |
| A-toasty           | 0.8 cd  | 0.8 d   | 1.4 a  | 0.8 d  | 1.0 bc  | 1.1 b   |
| A-woody            | 0.8 bc  | 0.9 bc  | 1.2 a  | 0.7 c  | 1.0 ab  | 1.0 ab  |
| A-tobacco          | 0.5 c   | 0.6 bc  | 0.9 a  | 0.6 bc | 0.6 bc  | 0.7 b   |
| T-bitter           | 3.0 b   | 3.2 b   | 3.6 a  | 3.1 b  | 3.5 a   | 3.7 a   |
| T-sweet            | 2.7 a   | 2.6 a   | 2.5 ab | 2.5 ab | 2.7 a   | 2.4 b   |
| T-sour             | 2.7 b   | 2.8 ab  | 2.8 ab | 2.9 ab | 2.7 b   | 3.0 a   |
| F-dark fruit       | 1.4 bc  | 1.6 ab  | 1.8 a  | 1.4 c  | 1.6 abc | 1.6 abc |
| F-red fruit        | 3.5 ab  | 3.3 b   | 2.9 c  | 3.6 a  | 3.2 b   | 2.9 c   |
| F-dried fruit      | 1.4 c   | 1.6 bc  | 2.0 a  | 1.4 a  | 1.7 ab  | 1.8 ab  |
| F-jammy            | 1.7 a   | 1.9 a   | 1.9 a  | 1.4 b  | 1.9 a   | 1.6 ab  |
| F-confectionery    | 2.4 a   | 2.2 ab  | 2.0 bc | 2.3 a  | 2.2 abc | 1.9 c   |
| F-cook vegetable   | 0.4 ab  | 0.4 ab  | 0.5 a  | 0.3 b  | 0.5 ab  | 0.5 ab  |
| F-earthly          | 0.7 cb  | 0.7 bcd | 1.0 a  | 0.7 d  | 0.9 ab  | 0.9 abc |
| F-floral           | 1.9 a   | 1.8 a   | 1.5 b  | 1.8 a  | 1.8 a   | 1.5 b   |
| F-mushroom         | 0.4 c   | 0.4 bc  | 0.7 a  | 0.4 bc | 0.6 ab  | 0.6 a   |
| F-green capsicum   | 0.5 ab  | 0.4 b   | 0.6 ab | 0.5 ab | 0.5 b   | 0.6 a   |
| F-herbaceous       | 1.1 ab  | 0.9 b   | 1.1 ab | 1.0 ab | 1.0 ab  | 1.2 a   |
| F-leather          | 0.4 bc  | 0.5 abc | 0.7 a  | 0.4 c  | 0.6 ab  | 0.7 a   |
| F-pepper           | 0.7 ab  | 0.6 b   | 0.8 ab | 0.6 b  | 0.8 a   | 0.7 ab  |
| F-savory           | 0.6 c   | 0.8 bc  | 1.0 ab | 0.7 c  | 1.1 a   | 1.0 ab  |
| F-spice            | 1.4 bc  | 1.4 bc  | 1.6 a  | 1.3 c  | 1.6 ab  | 1.4 abc |
| F-toasty           | 0.7 d   | 0.9 bcd | 1.1 ab | 0.8 cd | 1.0 abc | 1.2 a   |
| F-woody            | 0.8 c   | 0.9 c   | 1.2 a  | 0.9 bc | 0.9 bc  | 1.1 ab  |
| F-tobacco          | 0.5 b   | 0.6 b   | 0.9 a  | 0.5 b  | 0.8 a   | 0.8 a   |
| M-body             | 3.3 b   | 3.4 ab  | 3.5 a  | 3.3 ab | 3.4 ab  | 3.3 ab  |
| M-alcohol/heat     | 3.7 ab  | 3.8 ab  | 3.9 a  | 3.7 b  | 3.9 a   | 3.9 a   |
| M-astringency      | 2.6 bc  | 2.8 ab  | 2.8 ab | 2.5 c  | 2.7 ab  | 2.8 a   |
| M-smoothness       | 3.5 a   | 3.3 abc | 3.2 bc | 3.4 ab | 3.3 abc | 3.1 c   |
| M-roughness        | 2.4 bc  | 2.6 ab  | 2.6 ab | 2.3 c  | 2.5 abc | 2.7 a   |
| FL-fruit           | 3.5 a   | 3.6 a   | 3.2 c  | 3.4 ab | 3.5 ab  | 3.3 bc  |
| FL-non-fruit       | 3.5 cd  | 3.5 bcd | 3.7 ab | 3.4 d  | 3.7 abc | 3.8 a   |

Means within a row followed by different letters are significantly different. Significance level at  $p < 0.05$ , data analyzed by one-way ANOVA, Fisher's LSD. Prefix A- = aroma attribute, T- = taste; F- = flavor attribute, M- = mouthfeel, Ap- = appearance, FL- = aftertaste (fruit and non-fruit). Prefix PRE = *GL* added prior to fermentation (PRE 1, PRE 2 and PRE 4) and POST = *GL* added after fermentation (POST 1 and POST 4).
